# Supplementary material for: The association of calcium intake with osteoporotic vertebral fractures in a large Chinese cohort
Source: publisher site journal article supplement (doi:10.18632/aging.102974), 2020-03-28
Supplement: Supplementary file [file aging-v12i6-102974-supplementary-material-SD1.pdf]

## SUPPLEMENTARY FIGURES

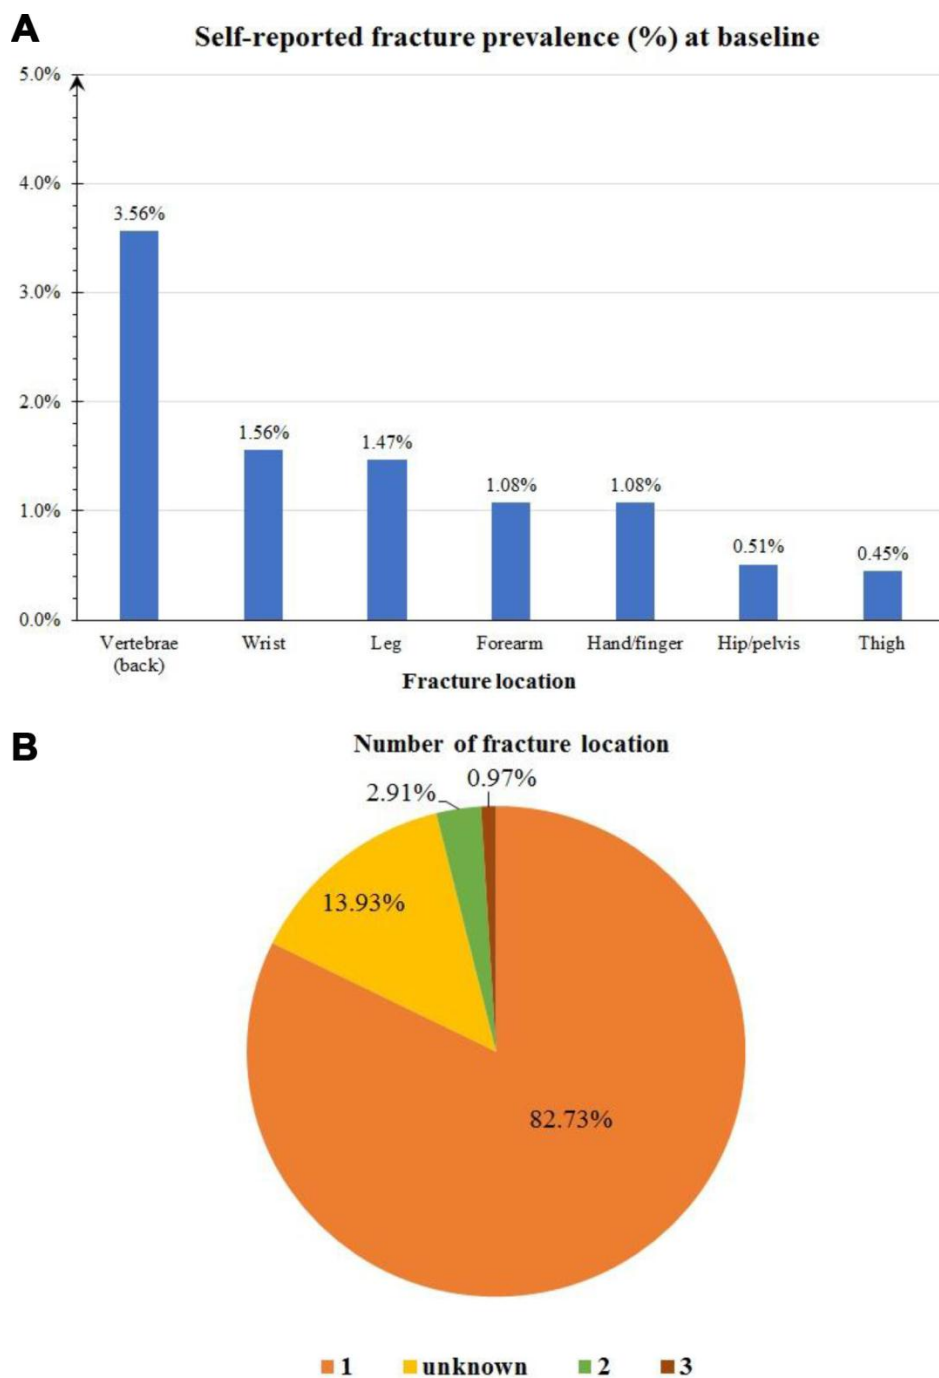

**Supplementary Figure 1.** (A and B) Self-reported fracture prevalence and location among Chinese adults aged between 35 and 70 years at baseline.

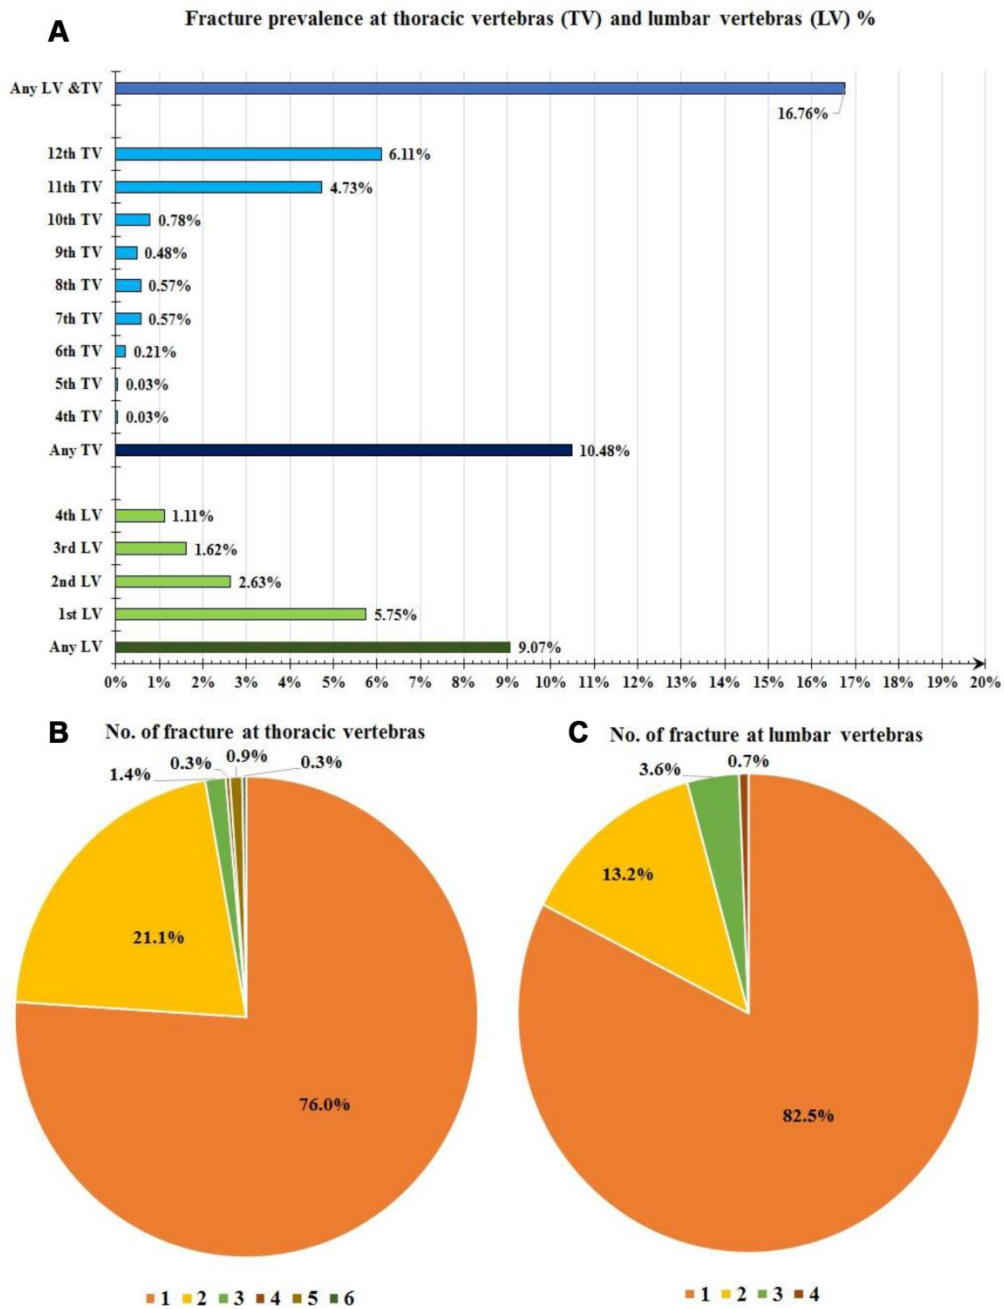

**Supplementary Figure 2.** (A and B) Fracture incidence and location at thoracic vertebra (TV) and lumbar vertebra (LV) during cohort follow-up.
