# Supplementary material for: The association of calcium intake with osteoporotic vertebral fractures in a large Chinese cohort
Source: publisher site journal article supplement (doi:10.18632/aging.102974), 2020-03-28
Supplement: Supplementary file [file aging-v12i6-102974-supplementary-material-SD2.pdf]

## SUPPLEMENTARY TABLES

**Supplementary Table 1. The CT scanner, scan parameters and recruitment in various centers.**

| Geographical regions | Center                                    | CT scanner                              | Scan kVp | Scan mAs | SFOV (mm) | Slice Thickness (mm) |
|----------------------|-------------------------------------------|-----------------------------------------|----------|----------|-----------|----------------------|
| Beijing              | Beijing Jishuitan Hospital                | Toshiba Aquilion PRIME 80               | 120      | 187      | 500       | 1                    |
|                      | Beijing Shijingshan Hospital              | GE LightSpeed VCT 64                    | 120      | 150      | 500       | 1.25                 |
| Liaoning Province    | Shenyang 4 <sup>th</sup> Hospital         | GE LightSpeed 16                        | 120      | 150      | 500       | 1.25                 |
|                      | Dayi Hospital                             | GE Optima CT660 64                      | 120      | 150      | 500       | 1.25                 |
| Sichuan Province     | Huaxi 2 <sup>nd</sup> Hospital            | Philips Brilliance 6                    | 120      | 150      | 500       | 2                    |
|                      | Chengdu 2 <sup>nd</sup> People's Hospital | Philips Brilliance 64                   | 120      | 150      | 500       | 1                    |
| Jiangsu Province     | Changzhou Wujing Hospital                 | SIEMENS SOMATOM Definition AS+          | 120      | 150      | 500       | 1                    |
|                      | No1 TCM Hospital                          | GE Optima CT660 64                      | 120      | 150      | 500       | 1.25                 |
|                      | No2 TCM Hospital                          | Philips iCT 256                         | 120      | 238      | 500       | 1                    |
| Shanxi Province      | Taiyuan Central Hospital                  | Toshiba Aquilion 64                     | 120      | 75       | 500       | 1                    |
| Shaanxi Province     | Red Cross Hospital of Shaanxi             | Philips Ingenuity CT 64                 | 120      | 150      | 500       | 1                    |
| Jiangxi Province     | Jiangxi Traditional Medicine Hospital     | GE Medical Systems Discovery CT750hd 64 | 120      | 150      | 500       | 1.25                 |

Note: TCM, traditional Chinese medicine; SFOV, standard field of view.

**Supplementary Table 2. Sensitivity analyses for vertebral fracture with calcium intake among women by menopausal status<sup>1</sup>.**

| Calcium intake from food        | Fracture risk % (n) |            |                    | Dichotomous odds ratio (95% confidence interval) <sup>2</sup> |                       |                       | Ordinal odds ratio (95% confidence interval) <sup>3</sup> |                       |                       |
|---------------------------------|---------------------|------------|--------------------|---------------------------------------------------------------|-----------------------|-----------------------|-----------------------------------------------------------|-----------------------|-----------------------|
|                                 | No                  | Mild       | Moderate or severe | Crude                                                         | Adjusted <sup>4</sup> | Adjusted <sup>5</sup> | Crude                                                     | Adjusted <sup>4</sup> | Adjusted <sup>5</sup> |
| <b>Premenopausal</b>            |                     |            |                    |                                                               |                       |                       |                                                           |                       |                       |
| Per 100-unit increase           | 717 (93.2)          | 42 (5.5)   | 10 (1.3)           | 0.92<br>(0.82, 1.03)                                          | 0.92<br>(0.81, 1.04)  | 0.92<br>(0.81, 1.05)  | 0.92<br>(0.82, 1.03)                                      | 0.92<br>(0.81, 1.04)  | 0.93<br>(0.81, 1.05)  |
| <i>P</i> value                  |                     |            |                    | 0.16                                                          | 0.17                  | 0.22                  | 0.16                                                      | 0.18                  | 0.24                  |
| Q1                              | 137 (90.1)          | 11 (7.2)   | 4 (2.6)            | ref.                                                          | ref.                  | ref.                  | ref.                                                      | ref.                  | ref.                  |
| Q2                              | 160 (93.6)          | 9 (5.3)    | 2 (1.2)            | 0.62<br>(0.28, 1.40)                                          | 0.49<br>(0.21, 1.14)  | 0.43<br>(0.18, 1.02)  | 0.63<br>(0.28, 1.41)                                      | 0.51<br>(0.22, 1.19)  | 0.45<br>(0.19, 1.07)  |
| Q3                              | 132 (91.7)          | 11 (7.6)   | 1 (0.7)            | 0.82<br>(0.37, 1.81)                                          | 0.58<br>(0.25, 1.35)  | 0.51<br>(0.21, 1.24)  | 0.83<br>(0.38, 1.84)                                      | 0.63<br>(0.27, 1.47)  | 0.58<br>(0.24, 1.39)  |
| Q4                              | 125 (95.4)          | 5 (3.8)    | 1 (0.7)            | 0.44<br>(0.16, 1.15)                                          | 0.33<br>(0.12, 0.89)  | 0.31<br>(0.11, 0.85)  | 0.44<br>(0.17, 1.17)                                      | 0.34<br>(0.12, 0.93)  | 0.32<br>(0.11, 0.89)  |
| Q5                              | 163 (95.3)          | 6 (3.5)    | 2 (1.2)            | 0.45<br>(0.18, 1.08)                                          | 0.39<br>(0.16, 0.95)  | 0.38<br>(0.15, 0.98)  | 0.45<br>(0.19, 1.09)                                      | 0.40<br>(0.16, 0.99)  | 0.40<br>(0.15, 1.03)  |
| <i>P</i> <sub>trend</sub>       |                     |            |                    | 0.29                                                          | 0.13                  | 0.11                  | 0.30                                                      | 0.17                  | 0.15                  |
| <b>Postmenopausal</b>           |                     |            |                    |                                                               |                       |                       |                                                           |                       |                       |
| Per 100-unit increase           | 986 (78.6)          | 184 (14.7) | 84 (6.7)           | 0.93<br>(0.89, 0.99)                                          | 0.92<br>(0.87, 0.97)  | 0.94<br>(0.89, 1.00)  | 0.94<br>(0.89, 0.99)                                      | 0.93<br>(0.87, 0.98)  | 0.94<br>(0.89, 1.00)  |
| <i>P</i> value                  |                     |            |                    | 0.01                                                          | <0.01                 | 0.03                  | 0.02                                                      | 0.01                  | 0.06                  |
| <b>Calcium intake quintiles</b> |                     |            |                    |                                                               |                       |                       |                                                           |                       |                       |
| Q1                              | 190 (74.8)          | 43 (16.9)  | 21 (8.3)           | ref.                                                          | ref.                  | ref.                  | ref.                                                      | ref.                  | ref.                  |

|                          |            |           |          |                      |                      |                      |                      |                      |                      |
|--------------------------|------------|-----------|----------|----------------------|----------------------|----------------------|----------------------|----------------------|----------------------|
| Q2                       | 168 (76.0) | 34 (15.4) | 19 (8.6) | 0.95<br>(0.63, 1.43) | 0.83<br>(0.54, 1.26) | 0.88<br>(0.57, 1.37) | 0.94<br>(0.62, 1.42) | 0.85<br>(0.55, 1.30) | 0.91<br>(0.58, 1.42) |
| Q3                       | 187 (77.3) | 35 (14.5) | 20 (8.3) | 0.88<br>(0.59, 1.33) | 0.74<br>(0.49, 1.12) | 0.80<br>(0.52, 1.23) | 0.87<br>(0.58, 1.32) | 0.75<br>(0.49, 1.14) | 0.81<br>(0.52, 1.26) |
| Q4                       | 220 (80.9) | 38 (14.0) | 14 (5.2) | 0.69<br>(0.46, 1.05) | 0.54<br>(0.36, 0.83) | 0.60<br>(0.39, 0.95) | 0.70<br>(0.46, 1.06) | 0.57<br>(0.37, 0.88) | 0.64<br>(0.41, 1.00) |
| Q5                       | 221 (83.4) | 34 (12.8) | 10 (3.8) | 0.58<br>(0.38, 0.89) | 0.50<br>(0.32, 0.78) | 0.59<br>(0.37, 0.93) | 0.59<br>(0.39, 0.91) | 0.53<br>(0.34, 0.83) | 0.62<br>(0.39, 0.99) |
| <i>P<sub>trend</sub></i> |            |           |          | 0.08                 | 0.01                 | 0.09                 | 0.10                 | 0.03                 | 0.17                 |

<sup>1</sup>Data of menopausal status were obtained via self-reporting at PURE baseline, not at QCT measurement.

<sup>2</sup>Mild, moderate, severe fracture were combined defined as fracture prevalent and no fracture.

<sup>3</sup>Three categories were defined as moderate/severe fracture, mild fracture, and no fracture.

<sup>4</sup>Adjusted for age.

<sup>5</sup>Adjusted for age, education level, BMI, waist circumference, tobacco use, alcohol consumption, and physical activities.

**Supplementary Table 3. Sensitivity analyses for vertebral fracture with calcium intake among women by age groups.**

| Calcium intake from food | Fracture risk % (n) |            |                    | Dichotomous odds ratio (95% confidence interval) <sup>1</sup> |                       |                       | Ordinal odds ratio (95% confidence interval) <sup>2</sup> |                       |                       |
|--------------------------|---------------------|------------|--------------------|---------------------------------------------------------------|-----------------------|-----------------------|-----------------------------------------------------------|-----------------------|-----------------------|
|                          | No                  | Mild       | Moderate or severe | Crude                                                         | Adjusted <sup>3</sup> | Adjusted <sup>4</sup> | Crude                                                     | Adjusted <sup>3</sup> | Adjusted <sup>4</sup> |
| <b>&lt;55 years</b>      |                     |            |                    |                                                               |                       |                       |                                                           |                       |                       |
| Per 100-unit increase    | 505 (95.6)          | 21 (4.0)   | 2 (0.4)            | 0.83<br>(0.68, 1.02)                                          | 0.84<br>(0.68, 1.03)  | 0.90<br>(0.73, 1.10)  | 0.83<br>(0.68, 1.02)                                      | 0.84<br>(0.68, 1.03)  | 0.90<br>(0.73, 1.10)  |
| <i>P value</i>           |                     |            |                    | 0.08                                                          | 0.09                  | 0.30                  | 0.08                                                      | 0.08                  | 0.29                  |
| Q1                       | 104 (91.2)          | 9 (7.9)    | 1 (1.2)            | ref.                                                          | ref.                  | ref.                  | ref.                                                      | ref.                  | ref.                  |
| Q2                       | 119 (96.0)          | 5 (4.0)    | 0 (0.0)            | 0.44<br>(0.14, 1.32)                                          | 0.44<br>(0.15, 1.34)  | 0.52<br>(0.17, 1.64)  | 0.44<br>(0.15, 1.32)                                      | 0.45<br>(0.15, 1.35)  | 0.52<br>(0.17, 1.64)  |
| Q3                       | 92 (93.9)           | 6 (6.1)    | 0 (0.0)            | 0.67<br>(0.24, 1.93)                                          | 0.67<br>(0.23, 1.94)  | 0.79<br>(0.25, 2.54)  | 0.68<br>(0.24, 1.94)                                      | 0.68<br>(0.24, 1.96)  | 0.79<br>(0.25, 2.55)  |
| Q4                       | 81 (98.8)           | 1 (1.2)    | 0 (0.0)            | 0.13<br>(0.02, 1.02)                                          | 0.13<br>(0.02, 1.06)  | 0.17<br>(0.02, 1.36)  | 0.13<br>(0.02, 1.02)                                      | 0.13<br>(0.02, 1.06)  | 0.17<br>(0.02, 1.36)  |
| Q5                       | 109 (99.1)          | 0 (0.0)    | 1 (1.2)            | 0.10<br>(0.01, 0.76)                                          | 0.10<br>(0.01, 0.77)  | 0.16<br>(0.02, 1.28)  | 0.10<br>(0.01, 0.76)                                      | 0.10<br>(0.01, 0.77)  | 0.16<br>(0.02, 1.28)  |
| <i>P<sub>trend</sub></i> |                     |            |                    | 0.07                                                          | 0.08                  | 0.23                  | 0.07                                                      | 0.08                  | 0.22                  |
| <b>≥55 years</b>         |                     |            |                    |                                                               |                       |                       |                                                           |                       |                       |
| Per 100-unit increase    | 1222 (80.2)         | 209 (13.7) | 92 (6.0)           | 0.93<br>(0.89, 0.98)                                          | 0.92<br>(0.87, 0.97)  | 0.94<br>(0.89, 0.99)  | 0.94<br>(0.89, 0.99)                                      | 0.93<br>(0.88, 0.98)  | 0.94<br>(0.89, 1.00)  |
| <i>P value</i>           |                     |            |                    | 0.01                                                          | <0.01                 | 0.02                  | 0.01                                                      | 0.01                  | 0.04                  |
| Calcium intake quintiles |                     |            |                    |                                                               |                       |                       |                                                           |                       |                       |
| Q1                       | 227 (76.4)          | 46 (15.5)  | 24 (8.1)           | ref.                                                          | ref.                  | ref.                  | ref.                                                      | ref.                  | ref.                  |
| Q2                       | 220 (78.3)          | 40 (14.2)  | 21 (7.5)           | 0.90<br>(0.61, 1.32)                                          | 0.81<br>(0.54, 1.20)  | 0.82<br>(0.54, 1.24)  | 0.90<br>(0.61, 1.33)                                      | 0.83<br>(0.56, 1.25)  | 0.85<br>(0.56, 1.30)  |
| Q3                       | 230 (78.8)          | 41 (14.0)  | 21 (7.2)           | 0.87<br>(0.60, 1.28)                                          | 0.72<br>(0.48, 1.07)  | 0.75<br>(0.50, 1.14)  | 0.87<br>(0.59, 1.29)                                      | 0.74<br>(0.50, 1.11)  | 0.77<br>(0.51, 1.18)  |
| Q4                       | 269 (82.5)          | 42 (12.9)  | 15 (4.6)           | 0.68<br>(0.46, 1.00)                                          | 0.53<br>(0.36, 0.80)  | 0.57<br>(0.38, 0.88)  | 0.69<br>(0.46, 1.02)                                      | 0.57<br>(0.38, 0.85)  | 0.60<br>(0.39, 0.93)  |
| Q5                       | 276 (84.4)          | 40 (12.2)  | 11 (3.4)           | 0.59<br>(0.39, 0.87)                                          | 0.53<br>(0.35, 0.80)  | 0.59<br>(0.39, 0.91)  | 0.60<br>(0.40, 0.90)                                      | 0.56<br>(0.37, 0.84)  | 0.63<br>(0.41, 0.97)  |
| <i>P<sub>trend</sub></i> |                     |            |                    | 0.05                                                          | 0.01                  | 0.06                  | 0.08                                                      | 0.02                  | 0.12                  |

<sup>1</sup>Mild, moderate, severe fracture were combined defined as fracture prevalent and no fracture.

<sup>2</sup>Three categories were defined as moderate/severe fracture, mild fracture, and no fracture.

<sup>3</sup>Adjusted for age.

<sup>4</sup>Adjusted for age, education level, BMI, waist circumference, tobacco use, alcohol consumption, and physical activities.
